# Supplementary material
Source: Elsevier journal article supplement (https://www.sciencedirect.com/science/article/pii/S1888429615000795)
Supplement: mmc1 [file S1888429615000795:mmc1.docx]

**Appendix 1**

**Optometric prescribing criteria**

What is your academic background in Optometry?

- BA in Israel
- MA in Israel
- Gur College*
- PCO**
- Degree Abroad
- Other:

* Gur College was a non-academic (certificate) program in optometry that existed in Israel prior to the 1991 Optometry Law

**PCO – Pennsylvania College of Optometry offers an undergraduate program in optometry in Israel

Are you a certified Optometrist?

- Temporary License holder
- Permanent License holder
- No License

* Recent graduates that passed their Board examinations hold a temporary license for a year and must provide proof of having worked in the field for at least a year to obtain a permanent license

Where do you work?

- Private Optical Store
- Optical Chain - at least 10 stores
- Clinic
- Other

Are you self-employed or do you hold a salaried position?

- Self employed
- Salaried position
- Other

Describe what your job entails

- Optometrist only
- Dispensing only
- Optometrist + Dispensing
- Optometrist + Store Management
- Other:

Do you receive an incentive on sales*?

- Yes
- No
- Other:

*commission

Gender

- Male
- Female

How many years have you been working as an optometrist? _______

**In your clinical practice, in what circumstances would you usually prescribe new lenses? For each question please answer in the case of the patient presenting without symptoms and with symptoms**

A hyperopic patient age 4-6, with a cylindrical component of less than 0.75DC, I would prescribe spectacles from ____ diopter

For example: If the Rx was +2.00 I would recommend spectacles, but if the RX was +1.50 I would not recommend spectacles, then mark +2.00

|  | +0.50 | +0.75 | +1.00 | +1.25 | +1.50 | +1.75 | +2.00 | +2.25 | +2.50 | +2.75 | +3.00 | +3.25 | +3.50 |
| --- | --- | --- | --- | --- | --- | --- | --- | --- | --- | --- | --- | --- | --- |
| With symptoms |  |  |  |  |  |  |  |  |  |  |  |  |  |
| Without symptoms |  |  |  |  |  |  |  |  |  |  |  |  |  |

A hyperopic patient age 6-10, with a cylindrical component of less than 0.75DC, I would prescribe spectacles from ________ Diopters

|  | +0.50 | +0.75 | +1.00 | +1.25 | +1.50 | +1.75 | +2.00 | +2.25 | +2.50 | +2.75 | +3.00 | +3.25 | +3.50 |
| --- | --- | --- | --- | --- | --- | --- | --- | --- | --- | --- | --- | --- | --- |
| With symptoms |  |  |  |  |  |  |  |  |  |  |  |  |  |
| Without symptoms |  |  |  |  |  |  |  |  |  |  |  |  |  |

A hyperopic patient age 10-20, with a cylindrical component of less than 0.75DC, I would prescribe spectacles from ________ Diopters

|  | +0.50 | +0.75 | +1.00 | +1.25 | +1.50 | +1.75 | +2.00 | +2.25 | +2.50 | +2.75 | +3.00 | +3.25 | +3.50 |
| --- | --- | --- | --- | --- | --- | --- | --- | --- | --- | --- | --- | --- | --- |
| With symptoms |  |  |  |  |  |  |  |  |  |  |  |  |  |
| Without symptoms |  |  |  |  |  |  |  |  |  |  |  |  |  |

A hyperopic patient age 20-40, with a cylindrical component of less than 0.75DC, I would prescribe spectacles from ________ Diopters

|  | +0.50 | +0.75 | +1.00 | +1.25 | +1.50 | +1.75 | +2.00 | +2.25 | +2.50 | +2.75 | +3.00 | +3.25 | +3.50 |
| --- | --- | --- | --- | --- | --- | --- | --- | --- | --- | --- | --- | --- | --- |
| With symptoms |  |  |  |  |  |  |  |  |  |  |  |  |  |
| Without symptoms |  |  |  |  |  |  |  |  |  |  |  |  |  |

A myopic patient age 6-10, with a cylindrical component of less than 0.75DC, I would prescribe spectacles from ________ Diopters

For example: If the patient has -2.00 D I would prescribe spectacles but if the refraction is 1.50 D I would not prescribe spectacles , then mark -2.00 D

|  | -0.25 | -0.50 | -0.75 | -1.00 | -1.25 | -1.50 | -1.75 | -2.00 | -2.25 | -2.50 |
| --- | --- | --- | --- | --- | --- | --- | --- | --- | --- | --- |
| With symptoms |  |  |  |  |  |  |  |  |  |  |
| Without symptoms |  |  |  |  |  |  |  |  |  |  |

A myopic patient age 10-20, with a cylindrical component < 0.75DC, I would prescribe spectacles from ________ Diopters

|  | -0.25 | -0.50 | -0.75 | -1.00 | -1.25 | -1.50 | -1.75 | -2.00 | -2.25 | -2.50 |
| --- | --- | --- | --- | --- | --- | --- | --- | --- | --- | --- |
| With symptoms |  |  |  |  |  |  |  |  |  |  |
| Without symptoms |  |  |  |  |  |  |  |  |  |  |

A yopic patient aged age 20-40, with a cylindrical component < 0.75DC, I would prescribe spectacles from ________ Diopters

|  | -0.25 | -0.50 | -0.75 | -1.00 | -1.25 | -1.50 | -1.75 | -2.00 | -2.25 | -2.50 |
| --- | --- | --- | --- | --- | --- | --- | --- | --- | --- | --- |
| With symptoms |  |  |  |  |  |  |  |  |  |  |
| Without symptoms |  |  |  |  |  |  |  |  |  |  |

An astigmatic patient 6-10 years old, without a spherical component, I would prescribe spectacles from ________ Diopters

For example: If the patient has -2.00 D, I would prescribe spectacles, but if the refraction is -1.50 I would not prescribe spectacles, then mark -2.00 D

|  | -0.25 | -0.50 | -0.75 | -1.00 | -1.25 | -1.50 | -1.75 | -2.00 | -2.25 | -2.50 | -2.75 | -3.00 |
| --- | --- | --- | --- | --- | --- | --- | --- | --- | --- | --- | --- | --- |
| With symptoms |  |  |  |  |  |  |  |  |  |  |  |  |
| Without symptoms |  |  |  |  |  |  |  |  |  |  |  |  |

An astigmatic patient 10-20 years old, without a spherical component, I would prescribe spectacles from ________ Diopters

|  | -0.25 | -0.50 | -0.75 | -1.00 | -1.25 | -1.50 | -1.75 | -2.00 | -2.25 | -2.50 | -2.75 | -3.00 |
| --- | --- | --- | --- | --- | --- | --- | --- | --- | --- | --- | --- | --- |
| With symptoms |  |  |  |  |  |  |  |  |  |  |  |  |
| Without symptoms |  |  |  |  |  |  |  |  |  |  |  |  |

An astigmatic patient 20-40 years old, without a spherical component , I would prescribe spectacles from ________ Diopters

|  | -0.25 | -0.50 | -0.75 | -1.00 | -1.25 | -1.50 | -1.75 | -2.00 | -2.25 | -2.50 | -2.75 | -3.00 |
| --- | --- | --- | --- | --- | --- | --- | --- | --- | --- | --- | --- | --- |
| With symptoms |  |  |  |  |  |  |  |  |  |  |  |  |
| Without symptoms |  |  |  |  |  |  |  |  |  |  |  |  |

A presbyopic patient aged 40-50, with a cylindrical component under 0.75DC, I would prescribe spectacles from ________ Diopters ADD

For example: If the patient has +2.00 D ADD, I would prescribe spectacles, but if the ADD is +1.50 I would not prescribe spectacles, then mark +2.00 D

|  | +0.75 | +1.00 | +1.25 | +1.50 | +1.75 | +2.00 | +2.25 | +2.5 | +2.75 | +3.00 |
| --- | --- | --- | --- | --- | --- | --- | --- | --- | --- | --- |
| With symptoms |  |  |  |  |  |  |  |  |  |  |
| Without symptoms |  |  |  |  |  |  |  |  |  |  |

A presbyopic patient aged 50-70, with a cylindrical component under 0.75DC, I would prescribe from _____Diopters ADD

|  | +0.75 | +1.00 | +1.25 | +1.50 | +1.75 | +2.00 | +2.25 | +2.5 | +2.75 | +3.00 |
| --- | --- | --- | --- | --- | --- | --- | --- | --- | --- | --- |
| With symptoms |  |  |  |  |  |  |  |  |  |  |
| Without symptoms |  |  |  |  |  |  |  |  |  |  |
